# Supplementary material for: Effects of different exercise types on vascular endothelial function in individuals with abnormal glycaemic control: a systematic review and network meta-analysis
Source: PeerJ. 2025 Aug 8;13:e19839. doi: 10.7717/peerj.19839 (PMC12338059; doi:10.7717/peerj.19839)
Supplement: Supplemental Information 3 [file peerj-13-19839-s003.xlsx]

## Sheet: FMD-r=0.3
ID	id	t	mean	sd	n
Abdi et al. (2021)	1	CON	-0.05	4.82	15
	1	AIE	6.22	8.19	15
Afousi et al. (2018)	2	CON	0.88	1.45	17
	2	ACE	1.35	2.34	17
	2	AIE	3.56	3.58	18
Choi et al. (2012)	3	CON	-0.1	5.95	37
	3	ACE	1.5	5.59	38
Cox et al. (2024)	4	CON	-0.3	0.8	23
	4	CE	0.6	0.9	23
Davoodi et al. (2022)	5	CON	0.87	2.57	15
	5	ACE	2.55	2.41	16
	5	AIE	2.97	3.18	16
Desch et al. (2010)	6	CON	-1.1	6.55	12
	6	ACE	4.4	6.44	14
Gainey et al. (2016)	7	ACE	4.6	1.19	11
	7	MBE	4.9	2.43	12
Gibbs et al. (2012)	8	CON	-0.2	5.3	63
	8	CE	0.7	4.6	49
Ku et al. (2009)	9	CON	0.79	2.97	18
	9	ACE	1.32	3.3	17
Kwon et al. (2011)	10	CON	-0.7	2.25	15
	10	ACE	2.1	2.08	13
	10	RE	0.7	3.14	12
Li 2009	11	CON	0.2	1.99	39
	11	MBE	2.5	2.04	40
Liu et al. (2007)	12	CON	-0.004	0.037	17
	12	ACE	0.8	1.6	17
	12	CE	1.1	2.1	16
Mitranun et al. (2014)	13	CON	0.5	1.88	15
	13	ACE	1.3	2.02	14
	13	AIE	2	1.19	14
Okada et al. (2010)	14	CON	1	5.21	17
	14	CE	3.6	6.56	21
Ploydang et al. (2023)	15	CON	-0.3	3.32	17
	15	ACE	2.4	2.93	16
Rech et al. (2019)	16	CON	0.6	3.95	21
	16	RE	-1.2	8.84	18
Wycherley et al. (2008)	17	CON	0.03	0.26	16
	17	ACE	-0.52	1.06	13

## Sheet: FMD-r=0.5
ID	id	t	mean	sd	n
Abdi et al. (2021)	1	CON	-0.05	4.82	15
	1	AIE	6.22	8.19	15
Afousi et al. (2018)	2	CON	0.88	1.45	17
	2	ACE	1.35	2.34	17
	2	AIE	3.56	3.58	18
Choi et al. (2012)	3	CON	-0.1	5.03	37
	3	ACE	1.5	4.72	38
Cox et al. (2024)	4	CON	-0.3	0.8	23
	4	CE	0.6	0.9	23
Davoodi et al. (2022)	5	CON	0.87	2.17	15
	5	ACE	2.55	2.04	16
	5	AIE	2.97	2.69	16
Desch et al. (2010)	6	CON	-1.1	5.62	12
	6	ACE	4.4	5.47	14
Gainey et al. (2016)	7	ACE	4.6	1.01	11
	7	MBE	4.9	2.17	12
Gibbs et al. (2012)	8	CON	-0.2	5.3	63
	8	CE	0.7	4.6	49
Ku et al. (2009)	9	CON	0.79	2.49	18
	9	ACE	1.32	2.79	17
Kwon et al. (2011)	10	CON	-0.7	1.9	15
	10	ACE	2.1	1.77	13
	10	RE	0.7	2.66	12
Li 2009	11	CON	0.2	1.71	39
	11	MBE	2.5	1.73	40
Liu et al. (2007)	12	CON	-0.004	0.037	17
	12	ACE	0.8	1.6	17
	12	CE	1.1	2.1	16
Mitranun et al. (2014)	13	CON	0.5	1.61	15
	13	ACE	1.3	1.71	14
	13	AIE	2	1.01	14
Okada et al. (2010)	14	CON	1	4.47	17
	14	CE	3.6	5.6	21
Ploydang et al. (2023)	15	CON	-0.3	2.8	17
	15	ACE	2.4	2.49	16
Rech et al. (2019)	16	CON	0.6	3.95	21
	16	RE	-1.2	8.84	18
Wycherley et al. (2008)	17	CON	0.03	0.26	16
	17	ACE	-0.52	1.06	13

## Sheet: FMD-r=0.7
ID	id	t	mean	sd	n
Abdi et al. (2021)	1	CON	-0.05	4.82	15
	1	AIE	6.22	8.19	15
Afousi et al. (2018)	2	CON	0.88	1.45	17
	2	ACE	1.35	2.34	17
	2	AIE	3.56	3.58	18
Choi et al. (2012)	3	CON	-0.1	3.9	37
	3	ACE	1.5	3.67	38
Cox et al. (2024)	4	CON	-0.3	0.8	23
	4	CE	0.6	0.9	23
Davoodi et al. (2022)	5	CON	0.87	1.69	15
	5	ACE	2.55	1.59	16
	5	AIE	2.97	2.09	16
Desch et al. (2010)	6	CON	-1.1	4.5	12
	6	ACE	4.4	4.28	14
Gainey et al. (2016)	7	ACE	4.6	0.8	11
	7	MBE	4.9	1.87	12
Gibbs et al. (2012)	8	CON	-0.2	5.3	63
	8	CE	0.7	4.6	49
Ku et al. (2009)	9	CON	0.79	1.93	18
	9	ACE	1.32	2.16	17
Kwon et al. (2011)	10	CON	-0.7	1.47	15
	10	ACE	2.1	1.38	13
	10	RE	0.7	2.07	12
Li 2009	11	CON	0.2	1.36	39
	11	MBE	2.5	1.37	40
Liu et al. (2007)	12	CON	-0.004	0.037	17
	12	ACE	0.8	1.6	17
	12	CE	1.1	2.1	16
Mitranun et al. (2014)	13	CON	0.5	1.29	15
	13	ACE	1.3	1.33	14
	13	AIE	2	0.8	14
Okada et al. (2010)	14	CON	1	3.57	17
	14	CE	3.6	4.44	21
Ploydang et al. (2023)	15	CON	-0.3	2.18	17
	15	ACE	2.4	1.95	16
Rech et al. (2019)	16	CON	0.6	3.95	21
	16	RE	-1.2	8.84	18
Wycherley et al. (2008)	17	CON	0.03	0.26	16
	17	ACE	-0.52	1.06	13
